# Supplementary material
Source: PubMed Central journal article supplement (PMC4248715)
Supplement: MCB.00596-14_zmb999100634so1.pdf [file MCB.00596-14_zmb999100634so1.pdf]

Table.S1

|                         |                                                           |
|-------------------------|-----------------------------------------------------------|
| <b>Cloning primers</b>  |                                                           |
| 1FFGFR13UTR             | TTAGACTAGTAACCCTGTCCCCAGTTTTCT                            |
| 1RFGFR13UTR             | TGACAAAGCTTCTCTGCCTCCCTGTCTTCTG                           |
| FMU3UFGFR1              | TCACCCACAATCCCCTTGTGGACATCGCATATTTCTCCTCCTCCTTTGCCGCTGGC  |
| RMU3UFGFR1              | GCCAGCGGCAAAGGAGGAGGAGAAATATGCGATGTCCAACAAGGGGATTGTGGGTGA |
|                         |                                                           |
| <b>qPCR primers</b>     |                                                           |
| mCox2-F                 | CAGGCCGACTAAATCAAGCAAC                                    |
| mCox2-R                 | CTAGGACAATGGGCATAAAGCT                                    |
| ncycophilinA-F          | TTCTCCTTTCACAGAATTATTCCA                                  |
| ncycophilinA-R          | CCGCCAGTGCCATTATGG                                        |
| WPRE-F                  | GGACGTCCTTCTGCTACGTC                                      |
| WPRE-R                  | GAGATCCGACTCGTCTGAGG                                      |
| RnaseP-F                | TGAGTTCAATGGCTGAGGTG                                      |
| RnaseP-R                | AATGGGCGGAGGAGAGTAGT                                      |
| qcFos-F                 | GGGGCAAGGTGGAACAGT                                        |
| qcFos-R                 | TCTCCGCTTGGAGTGTATCA                                      |
| qEgr1-F                 | GACGAGTTATCCCAGCCAAA                                      |
| qEgr1-R                 | GGCAGAGGAAGACGATGAAG                                      |
| qHsl-F                  | GCTGGGCTGTCAAGCACTGT                                      |
| qHsl-R                  | GTAAGTGGGTAGGCTGCCAT                                      |
| qAtgl-F                 | TGTGGCCTCATTCTCCTAC                                       |
| qAtgl-R                 | TCGTGGATGTTGGTGGAGCT                                      |
| qScd1-F                 | CATCATTCTCATGGTCTGCT                                      |
| qScd1-R                 | CCCAGTCGTACACGTCATTTT                                     |
| qLpl-F                  | TTTTCTGGGACTGAGGATGG                                      |
| qLpl-R                  | GTCAGGCCAGCTGAAGTAGG                                      |
| qAcca-F                 | GGAGATGTACGCTGACCGAGAA                                    |
| qAcca-R                 | ACCCGACGCATGGTTTTCA                                       |
| qUcp2-F                 | ACTTTCCTCTGGATACCGC                                       |
| qUcp2-R                 | ACGGAGGCAAAGCTCATCTG                                      |
| qUcp1-F                 | ACTGCCACACCTCCAGTCATT                                     |
| qUcp1-R                 | CTTTCCTCACTCAGGATTGG                                      |
| qPrdm16-F               | CAGCACGGTGAAGCCATTC                                       |
| qPrdm16-R               | GCGTGCATCCGCTTGTG                                         |
| qCidea-F                | TGCTCTTCTGTATCGCCAGT                                      |
| qCidea-R                | GCCGTGTTAAGGAATCTGCTG                                     |
| qAp2-F                  | ACACCGAGATTTCTTCAAAGT                                     |
| qAp2-R                  | CCATCTAGGGTTATGATGCTCTTCA                                 |
| qTle3-F                 | TGGTGAGCTTTGGAGCTGTT                                      |
| qTLE3-R                 | CGGTTTCCCTCCAGGAAT                                        |
| qPgc1a-F                | CGAGGTGAAAGATTTCGAAA                                      |
| qPgc1a-R                | GGCCTTGACCTTGTTTCATGT                                     |
| 36B4-F                  | CGACATCACAGAGCAGGC                                        |
| 36B4-R                  | CACCGAGGCAACAGTTGG                                        |
| qFgfr1-F                | CTGAAGGAGGGTCATCGAAT                                      |
| qFgfr1-R                | GTCCAGGTCTTCCACCAACT                                      |
| qbKI-F                  | CGAGCCCATTGTTACCTTGT                                      |
| qbKI-R                  | CTCAAAGGTCTGGAAGCAG                                       |
|                         |                                                           |
| <b>Chip-seq primers</b> |                                                           |
| Ucp1-2F                 | GCTCACAGACTGCCGTTTATTAT                                   |
| Ucp1-2R                 | CAGCCTGGTCTACAGAGTGAGTT                                   |
| Prdm16-2F               | ATTCGGCATGACTTAGAACGTAA                                   |
| Prdm16-2R               | CTCAGGATTTTCACAAAATGGAC                                   |
| Ppary-1F                | CTGGCGAGACAATGTAGCAA                                      |
| Ppary-1R                | TGGCACTGTCTGACTGAGA                                       |
| Cebpb-2F                | CGTTTCGAGCATTAAAGTGAAGA                                   |
| Cebpb-2R                | CAAAATCTCGCATAAAATCAAAG                                   |
